# Supplementary material
Source: PubMed Central journal article supplement (PMC6297072)
Supplement: NIHMS997106-supplement-Suppemententary_file.pdf [file NIHMS997106-supplement-Suppemententary_file.pdf]

**Supplementary Table S1. RT PCR results showing attenuation of WNT signaling pathway after GT3 post-radiation exposure.** RT-PCR-based gene expression profiling was performed with tissue extracts obtained from mice with and without radiation exposure (see Materials and Methods) to assess the expression of genes involved in cellular processes that facilitate or regulate WNT signaling. Significant fold changes of irradiated vehicle (RV) and irradiated GT3 groups (R + GT3) compared to non-irradiated vehicle (NRV) control is shown in the table. Data presented as mean  $\pm$  standard error of mean; all genes listed in this table have a p-value  $\leq$  0.00001. Highlighted genes have been graphically represented in Figure 7 and Supplementary Figure 1.

| <b>Gene</b>   | <b>Day post-TBI</b> | <b>RV<br/>(Fold change <math>\pm</math> SEM)</b> | <b>R + GT3<br/>(Fold change <math>\pm</math> SEM)</b> |
|---------------|---------------------|--------------------------------------------------|-------------------------------------------------------|
| <b>CCND1</b>  | Day1                | 12.58 $\pm$ 1.35                                 | 9.58 $\pm$ 0.93                                       |
|               | Day4                | 11.96 $\pm$ 0.38                                 | 19.16 $\pm$ 0.21                                      |
|               | Day7                | 12.70 $\pm$ 0.32                                 | 7.78 $\pm$ 0.80                                       |
|               | Day14               | 13.80 $\pm$ 0.75                                 | 4.47 $\pm$ 0.09                                       |
| <b>CTBP1</b>  | Day1                | 2.03 $\pm$ 1.25                                  | 2.18 $\pm$ 0.67                                       |
|               | Day4                | 3.94 $\pm$ 0.20                                  | 4.37 $\pm$ 0.37                                       |
|               | Day7                | 2.46 $\pm$ 0.43                                  | 1.90 $\pm$ 0.93                                       |
|               | Day14               | 20.92 $\pm$ 0.75                                 | 5.02 $\pm$ 0.23                                       |
| <b>CTNNB1</b> | Day1                | 2.39 $\pm$ 0.89                                  | 2.08 $\pm$ 0.53                                       |
|               | Day4                | 3.20 $\pm$ 0.17                                  | 5.25 $\pm$ 0.22                                       |
|               | Day7                | 2.96 $\pm$ 0.32                                  | 2.28 $\pm$ 0.57                                       |
|               | Day14               | 11.47 $\pm$ 0.70                                 | 1.73 $\pm$ 0.29                                       |
| <b>DAAMI</b>  | Day1                | 5.60 $\pm$ 1.97                                  | 14.19 $\pm$ 1.17                                      |
|               | Day4                | 4.86 $\pm$ 0.45                                  | 8.94 $\pm$ 0.17                                       |
|               | Day7                | 6.50 $\pm$ 0.20                                  | 7.78 $\pm$ 0.60                                       |
|               | Day14               | 72.84 $\pm$ 0.43                                 | 23.59 $\pm$ 0.12                                      |
| <b>EP300</b>  | Day1                | 1.50 $\pm$ 1.16                                  | 1.23 $\pm$ 0.83                                       |
|               | Day4                | 2.49 $\pm$ 0.10                                  | 2.95 $\pm$ 0.09                                       |
|               | Day7                | 1.87 $\pm$ 0.38                                  | 1.58 $\pm$ 0.73                                       |
|               | Day14               | 10.95 $\pm$ 0.57                                 | 3.39 $\pm$ 0.13                                       |
| <b>Fbxw11</b> | Day1                | 1.73 $\pm$ 2.31                                  | 4.17 $\pm$ 1.17                                       |
|               | Day4                | 2.60 $\pm$ 0.07                                  | 3.71 $\pm$ 0.25                                       |
|               | Day7                | 3.40 $\pm$ 0.38                                  | 2.04 $\pm$ 0.47                                       |
|               | Day14               | 17.39 $\pm$ 0.41                                 | 3.89 $\pm$ 0.28                                       |
| <b>Fbxw2</b>  | Day1                | 3.29 $\pm$ 1.28                                  | 1.86 $\pm$ 1.57                                       |

|              |       |              |              |
|--------------|-------|--------------|--------------|
|              | Day4  | 2.16 ± 0.61  | 3.47 ± 0.19  |
|              | Day7  | 4.29 ± 0.38  | 3.16 ± 0.77  |
|              | Day14 | 24.03 ± 0.31 | 10.75 ± 0.22 |
| <b>Frzb</b>  | Day1  | 3.15 ± 2.17  | 3.31 ± 1.70  |
|              | Day4  | 2.73 ± 0.85  | 5.38 ± 0.19  |
|              | Day7  | 8.19 ± 0.68  | 5.63 ± 0.90  |
|              | Day14 | 45.89 ± 0.27 | 5.25 ± 0.20  |
| <b>Fzd1</b>  | Day1  | 7.93 ± 1.23  | 5.50 ± 0.37  |
|              | Day4  | 23.92 ± 0.09 | 31.85 ± 0.15 |
|              | Day7  | 23.70 ± 0.56 | 13.24 ± 0.87 |
|              | Day14 | 45.89 ± 0.70 | 4.27 ± 0.19  |
| <b>Fzd5</b>  | Day1  | 1.37 ± 1.21  | 0.91 ± 1.97  |
|              | Day4  | 1.08 ± 0.42  | 2.04 ± 0.22  |
|              | Day7  | 2.00 ± 0.31  | 1.73 ± 0.30  |
|              | Day14 | 13.18 ± 0.27 | 2.69 ± 0.20  |
| <b>FZD6</b>  | Day1  | 0.90 ± 0.42  | 1.25 ± 0.47  |
|              | Day4  | 2.60 ± 0.25  | 3.39 ± 0.36  |
|              | Day7  | 2.14 ± 0.29  | 0.97 ± 0.60  |
|              | Day14 | 3.78 ± 0.38  | 0.51 ± 0.18  |
| <b>Gsk3b</b> | Day1  | 4.55 ± 1.10  | 3.09 ± 1.03  |
|              | Day4  | 3.43 ± 0.48  | 6.32 ± 0.20  |
|              | Day7  | 3.56 ± 0.32  | 3.47 ± 0.43  |
|              | Day14 | 19.07 ± 0.41 | 4.27 ± 0.23  |
| <b>Jun</b>   | Day1  | 2.56 ± 1.36  | 1.38 ± 0.30  |
|              | Day4  | 3.20 ± 0.61  | 6.03 ± 0.26  |
|              | Day7  | 3.10 ± 0.70  | 1.86 ± 0.63  |
|              | Day14 | 6.15 ± 0.82  | 0.95 ± 0.20  |
| <b>Lrp5</b>  | Day1  | 3.00 ± 1.42  | 2.08 ± 0.50  |
|              | Day4  | 6.41 ± 0.13  | 7.43 ± 0.09  |
|              | Day7  | 4.39 ± 0.68  | 1.77 ± 1.50  |

|                 |       |              |             |
|-----------------|-------|--------------|-------------|
|                 | Day14 | 6.01 ± 0.60  | 0.83 ± 0.33 |
| <b>LRP6</b>     | Day1  | 1.77 ± 1.25  | 1.65 ± 0.9  |
|                 | Day4  | 2.07 ± 0.18  | 1.82 ± 0.15 |
|                 | Day7  | 2.00 ± 0.49  | 1.22 ± 0.50 |
|                 | Day14 | 3.61 ± 0.46  | 0.74 ± 0.15 |
| <b>PORCN</b>    | Day1  | 1.61 ± 0.85  | 1.86 ± 0.33 |
|                 | Day4  | 6.56 ± 0.21  | 6.03 ± 0.32 |
|                 | Day7  | 2.89 ± 0.54  | 1.65 ± 0.57 |
|                 | Day14 | 5.74 ± 0.66  | 0.72 ± 0.06 |
| <b>Ppp2ca</b>   | Day1  | 1.04 ± 1.63  | 1.04 ± 1.27 |
|                 | Day4  | 1.27 ± 0.09  | 1.41 ± 0.15 |
|                 | Day7  | 1.48 ± 0.26  | 1.44 ± 0.67 |
|                 | Day14 | 12.30 ± 0.58 | 3.02 ± 0.22 |
| <b>Ppp2r1a</b>  | Day1  | 2.28 ± 1.13  | 1.69 ± 1.13 |
|                 | Day4  | 1.11 ± 0.44  | 1.82 ± 0.21 |
|                 | Day7  | 2.09 ± 0.35  | 2.04 ± 0.43 |
|                 | Day14 | 10.95 ± 0.58 | 1.65 ± 0.24 |
|                 | Day14 | 2.68 ± 0.69  | 0.56 ± 0.30 |
| <b>SFRP1</b>    | Day1  | 1.54 ± 1.49  | 2.34 ± 1.06 |
|                 | Day4  | 3.20 ± 0.21  | 4.79 ± 0.38 |
|                 | Day7  | 4.81 ± 0.65  | 2.51 ± 0.43 |
|                 | Day14 | 4.66 ± 0.95  | 0.81 ± 0.23 |
| <b>SLC9A3R1</b> | Day1  | 5.35 ± 1.34  | 3.89 ± 1.10 |
|                 | Day4  | 3.36 ± 0.26  | 4.68 ± 0.21 |
|                 | Day7  | 3.56 ± 0.95  | 4.68 ± 0.10 |
|                 | Day14 | 8.50 ± 0.42  | 0.34 ± 2.70 |
| <b>TCF7L1</b>   | Day1  | 0.86 ± 1.38  | 1.07 ± 1.23 |
|                 | Day4  | 1.88 ± 0.23  | 2.34 ± 0.06 |
|                 | Day7  | 2.58 ± 0.32  | 1.86 ± 0.30 |
|                 | Day14 | 4.05 ± 0.80  | 0.43 ± 0.23 |

|              |       |              |              |
|--------------|-------|--------------|--------------|
| <b>Tle1</b>  | Day1  | 2.74 ± 1.62  | 1.20 ± 1.67  |
|              | Day4  | 2.02 ± 0.38  | 3.47 ± 0.40  |
|              | Day7  | 3.33 ± 0.38  | 3.16 ± 0.23  |
|              | Day14 | 13.49 ± 0.61 | 1.86 ± 0.27  |
| <b>Wisp1</b> | Day1  | 4.88 ± 1.35  | 4.27 ± 1.37  |
|              | Day4  | 4.43 ± 0.15  | 6.62 ± 0.26  |
|              | Day7  | 6.65 ± 0.26  | 6.03 ± 0.03  |
|              | Day14 | 9.11 ± 0.46  | 1.99 ± 0.09  |
| <b>Wnt6</b>  | Day1  | 15.85 ± 1.39 | 17.07 ± 1.63 |
|              | Day4  | 11.16 ± 0.34 | 20.07 ± 0.32 |
|              | Day7  | 21.11 ± 0.30 | 14.19 ± 0.03 |
|              | Day14 | 21.91 ± 0.55 | 4.07 ± 0.06  |
| <b>WNT7A</b> | Day1  | 1.94 ± 0.84  | 0.95 ± 0.83  |
|              | Day4  | 4.64 ± 0.29  | 5.02 ± 0.56  |
|              | Day7  | 3.33 ± 0.66  | 0.95 ± 1.1   |
|              | Day14 | 3.15 ± 0.72  | 0.46 ± 0.45  |

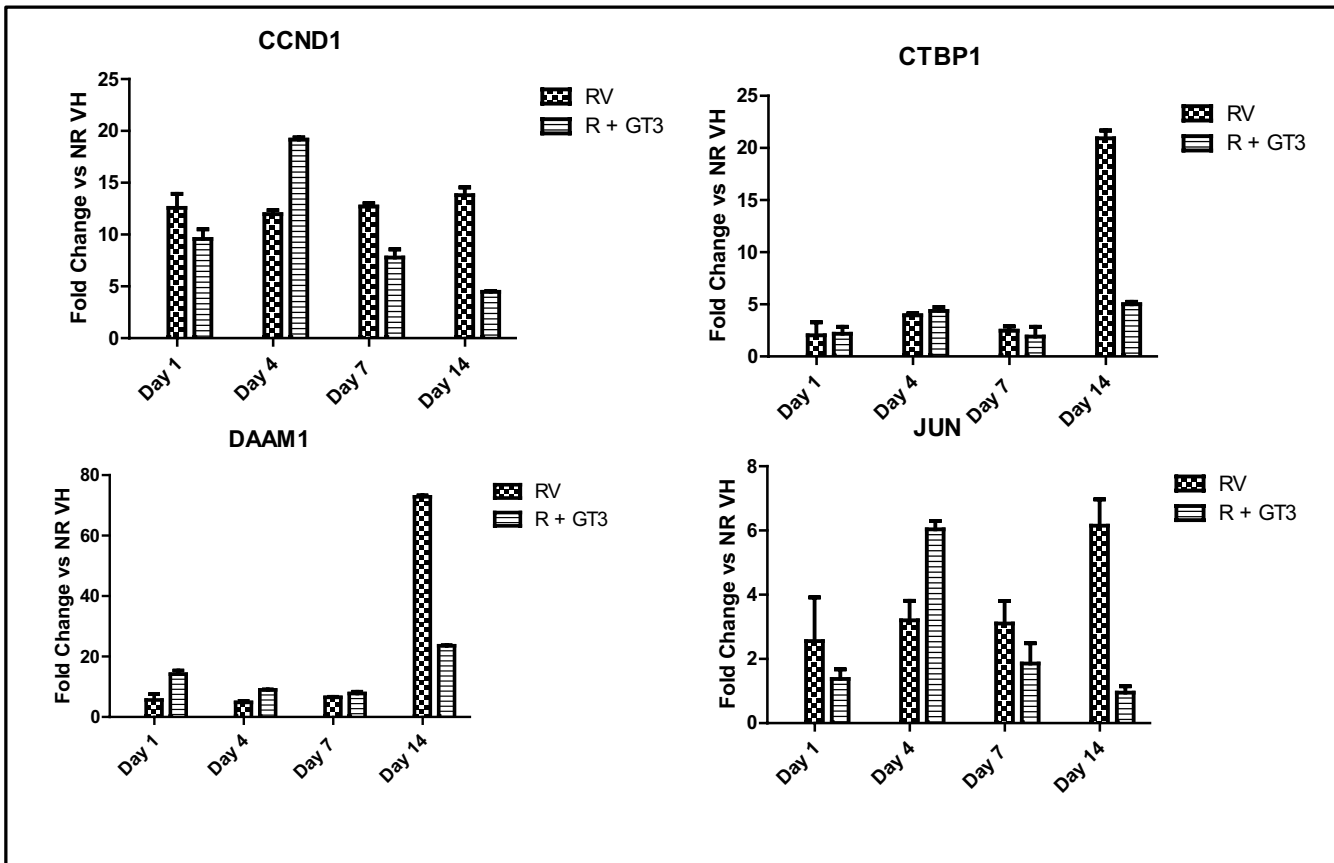

**Supplementary Figure S1. RT PCR results showing attenuation of WNT signaling pathway after GT3 at Day 14 post-radiation exposure.** RT-PCR-based gene expression profiling was performed with tissue extracts obtained from mice with and without radiation exposure (see [Materials and Methods](#)) to assess the expression of genes involved in cellular processes that facilitate or regulate WNT signaling.
